# Supplementary material for: Structural and solution studies of phenylbismuth(III) sulfonate complexes and their activity against Helicobacter pylori
Source: Royal Society of Chemistry journal article supplement (doi:10.1039/c0dt00629g), 2010-01-01
Supplement: c0dt00629g.pdf [file c0dt00629g.pdf]

## Supplementary Information

### Structural and Solution Studies of Phenylbismuth(III) Sulfonate Complexes and their Activity against *Helicobacter pylori*

Philip C. Andrews,\* Madleen Busse, Glen. B. Deacon, Richard. L. Ferrero, Peter C. Junk, Katie K. Huynh, Ish Kumar and Jonathan G. MacLellan

<sup>1</sup>H NMR spectrum in D<sub>6</sub>-DMSO of [Ph<sub>2</sub>Bi(O<sub>3</sub>S-Cam)] showing ligand redistribution to [PhBi(O<sub>3</sub>S-Cam)<sub>2</sub>], and BiPh<sub>3</sub>.

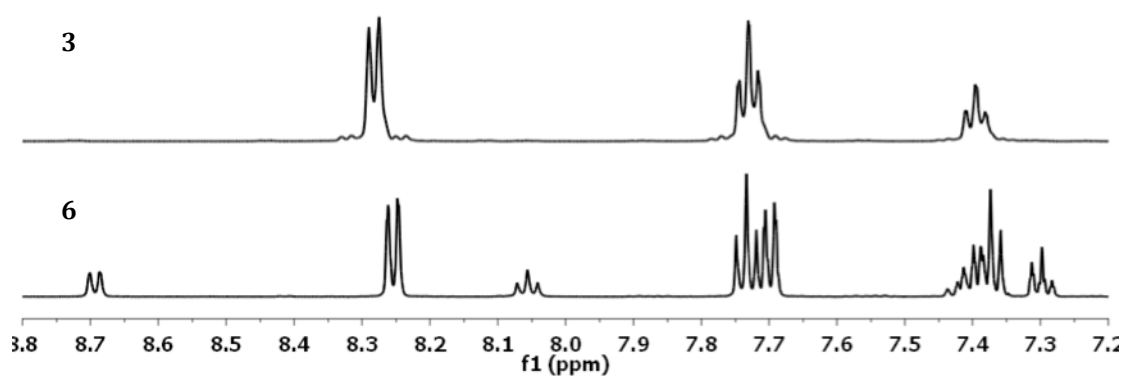

|                                                   | <i>ortho</i> | <i>meta</i> | <i>para</i> |
|---------------------------------------------------|--------------|-------------|-------------|
| BiPh <sub>3</sub>                                 | 7.76         | 7.42        | 7.30        |
| Ph <sub>2</sub> Bi(O <sub>3</sub> S-Cam) <b>3</b> | 8.24         | 7.70        | 7.37        |
| PhBi(O <sub>3</sub> S-Cam) <sub>2</sub> <b>6</b>  | 8.68         | 8.06        | 7.41        |
